# Supplementary material for: Intervening Effects and Molecular Mechanism of Quercitrin on PCV2-Induced Histone Acetylation, Oxidative Stress and Inflammatory Response in 3D4/2 Cells
Source: MDPI journal article supplement (doi:10.3390/antiox11050941), 2022-05-11
Supplement: s1 [file s1]

Table S1 Gene sequences

| Gene name      | Sequence                                                                 |
|----------------|--------------------------------------------------------------------------|
| $\beta$ -actin | F:5'-GATGAGATTGGCATGGCTTT-3'<br>R:5'-CACCTTCACCGTTCCAGTTT-3'             |
| Nrf2           | F:5'-GAAAGCCCAGTCTTCATTGC-3'<br>R:5'-TTGGAACCGTGCTAGTCTCA-3'             |
| Gpx1           | F:5'-GGCACAACGGTGCGGGACTA-3'<br>R:5'-AGGCGAAGAGCGGGTGAGCA-3'             |
| Keap1          | F:5'-GCCTCATCGAGTTCGCTTAC-3'<br>R:5'-CACGGACCACACTGTCAATC-3'             |
| HO-1           | F:5'-GCTGAGAATGCC GAGTTCAT-3'<br>R:5'-TGTAGACCGGGTTCTCCTTG-3'            |
| NQO1           | F:5'-TGCCTTCCTTGACTTGCT-3'<br>R:5'-TCCCGGCTTTACATCCTA-3'                 |
| SOD1           | F:5'-CAGGTCCTCACTTCAATCC-3'<br>R:5'-CCAAACGACTTCCAGCAT-3'                |
| IL-6           | F:5'-TACCCCCACGAGAAGATTCC-3'<br>R:5'-GCCATCTTTGGAAGGTTTCAG-3'            |
| IL-8           | F:5'-ACTGGCTGTTGCCTTCTT-3'<br>R:5'-CAGTTCTCTTCAAAAATATCTG-3'             |
| IL-10          | F:5'-CTGGCATTGTCATGGACTCT-3"<br>R:5'-GCGATGATCTTGATCTTCAT-3'             |
| I $\kappa$ B   | F:5'-TCAACAACCTTCTCCGTGGCGCAATG-3'<br>R:5'-AGGAGATGGAGGTGCCCTGGCTAA-3'   |
| P38            | F:5'-TCTGTAGGAAATCACACTAGG-3'<br>R:5'-GTATGCACTTCAGATCTTCAC-3'           |
| P65            | F:5'-AGTACCCTGAGGCTATAACTCG-3'<br>R:5'-TGAGAAGTCCATGTCCGCAAT-3'          |
| AKT            | F:5'-TCAACAACCTTCTCCGTGGCGCAATG- 3'<br>R:5'-AGGAGATGGAGGTGCCC TGGCTAA-3" |
| HAT1           | F: 5'- GATGATGAA AGATGGCACTAC-3'<br>R: 5'-CCTTGACCTTGAAATGGAGT-3'        |
| HDAC1          | F: 5'- CCCCAGGGACTAGACAGGAA-3'<br>R: 5'- TGGAGAGGGATGGATGGTG-3'          |
